# Supplementary material
Source: PubMed Central journal article supplement (PMC6864276)
Supplement: NIHMS1540470-supplement-1.pdf [file NIHMS1540470-supplement-1.pdf]

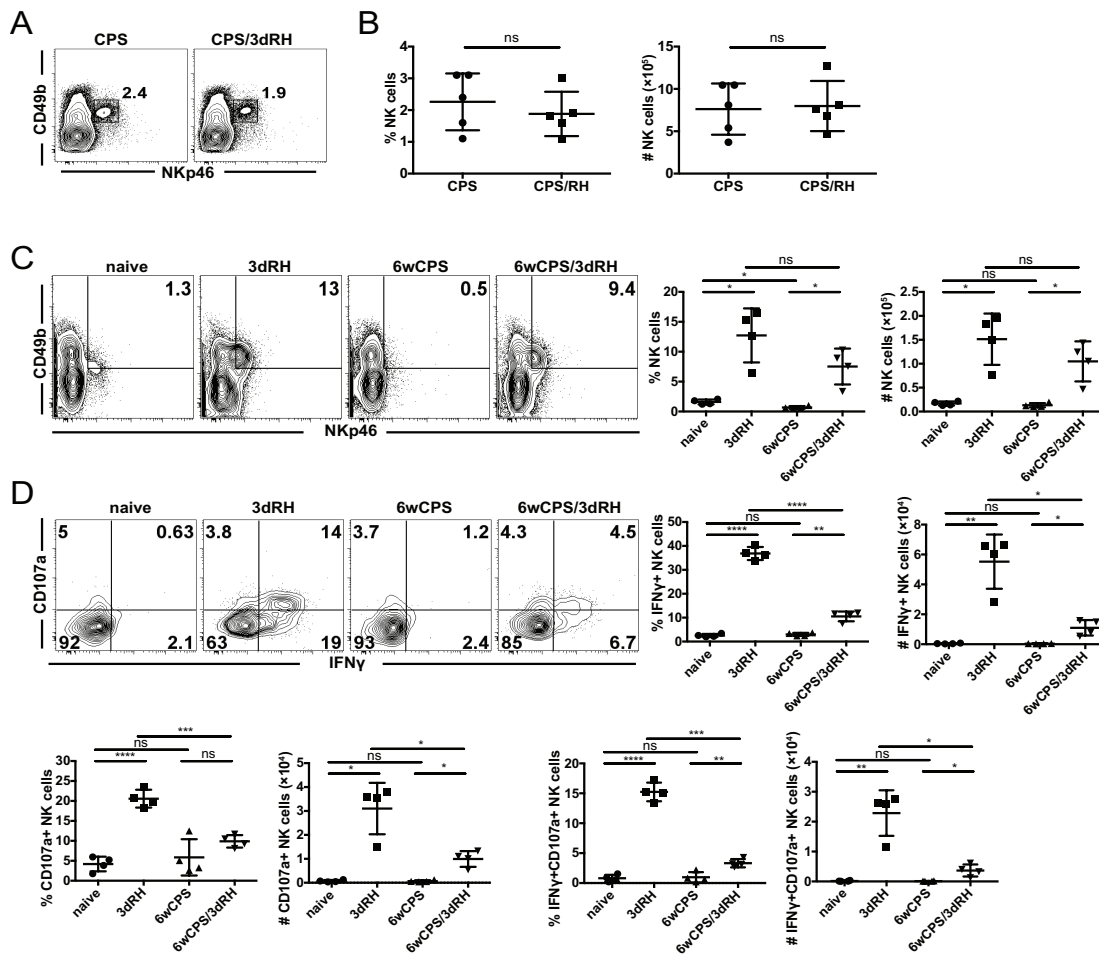

**Supplemental Figure 1.** NK cells become activated during an adaptive recall response. (A, B) B6 mice were infected i.p. with  $1 \times 10^6$  CPS and then infected i.p. with  $1 \times 10^3$  RH tachyzoites 5–6 wk later. Spleens were analyzed by flow cytometry 3 d after RH infection. (A, B) (A) Representative contour plots present the frequency of CD49b+ NKp46+ NK cells in spleen. (B) The percent and number of NK cells (CD49b+ NKp46+ in CD3<sup>-</sup> live lymphocytes) per spleen are presented in graphs. Representative data from one of six independent experiments are shown with an  $n = 5$  mice/group. (C, D) PECs were harvested from naïve B6 mice and from B6 mice 3 d after RH infection ( $1 \times 10^3$  RH tach.; 3dRH), 6 wk after CPS infection ( $1 \times 10^6$  CPS tachyzoites; 6w CPS) and 3 d after RH reinfection ( $1 \times 10^3$  RH tach.; 6w CPS/3dRH). (C) Representative contour plots are presented and show the frequency of NK cells in total PEC. The graphs present the percent and absolute number of NK cells in PEC from 1 experiment repeated twice. (D) Representative contour plots present the frequency of CD107a+ and IFN $\gamma$ + NK cells in PEC. The graphs present the percentage and number of IFN $\gamma$ +, CD107a+ and IFN $\gamma$ +CD107a+ NK cells in PEC. Data are representative of one of two independent experiments,  $n = 4$  mice/group. Data are the mean  $\pm$  SD. Unpaired Student's t-test with Welch's correction. ns, not significant; \* $p < 0.05$ , \*\* $p < 0.01$ , \*\*\* $p < 0.001$ , \*\*\*\* $p < 0.0001$ .

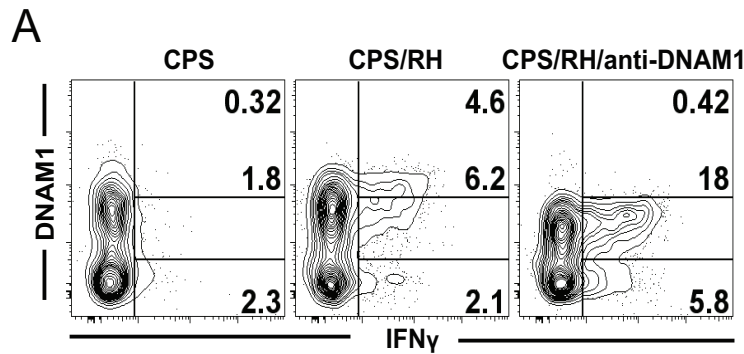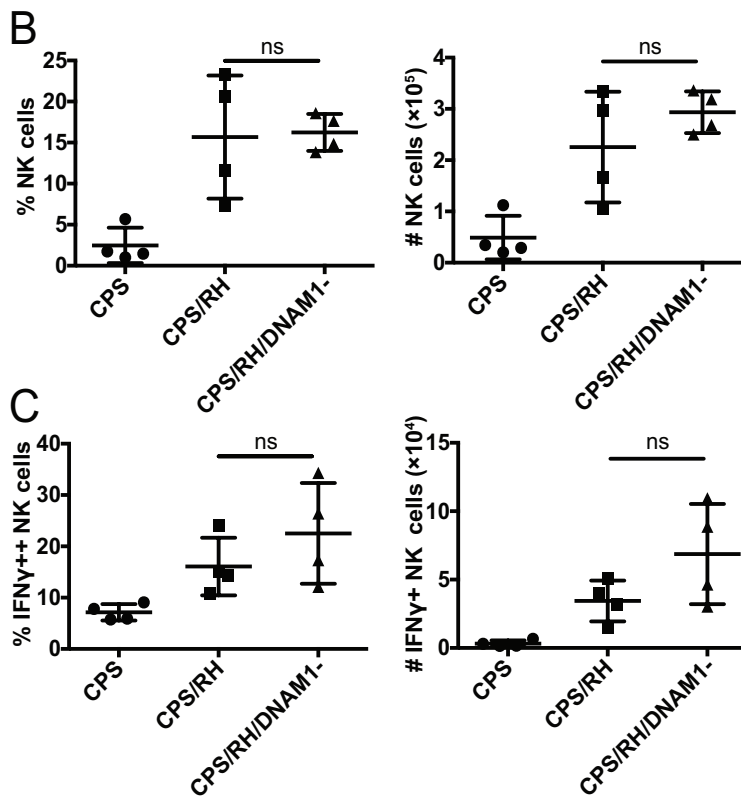

**Supplemental Figure 2.** NK cells become activated independent of DNAM-1 during secondary *T. gondii* infection. (A-C) B6 mice were infected i.p. with  $1 \times 10^6$  CPS, reinfected i.p. with  $1 \times 10^3$  RH tachyzoites 6 wk later and were treated with 100  $\mu$ g i.p. anti-DNAM-1 on d -1 and 0. PECs were analyzed by flow cytometry at d 3 after RH infection. (A) Representative contour plots of NK cell (CD49b+NKp46+CD3<sup>-</sup> live lymphocytes) expression of DNAM-1 vs. IFN $\gamma$  production. (B and C) The graphs present the frequency and number of (B) total and (C) IFN $\gamma$ <sup>+</sup> NK cells. Data presented are from 1 experiment and are the mean  $\pm$  SD, n = 4 mice/group. ns, not significant, one-way ANOVA.

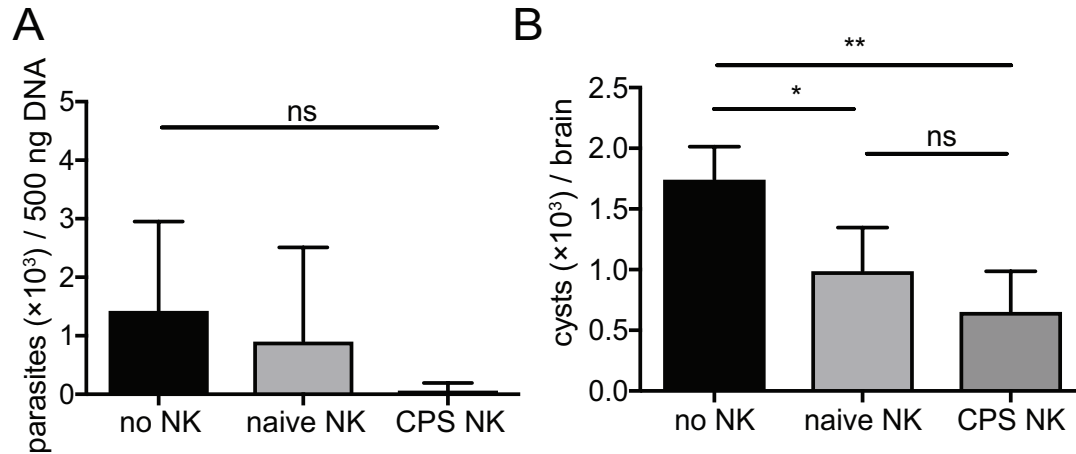

**Supplemental Figure 3.** *T. gondii*-experienced and naïve NK cells are not intrinsically different in their ability to protect against secondary challenge. (**A** and **B**) NK cells were purified from spleens of naïve B6 mice (naïve NK) and from B6 mice 5 wk after CPS immunization (CPS NK) and i.v. transferred into B6 mice ( $3 \times 10^6$  NK cells/mouse). Recipient mice were challenged with either RH tachyzoites or ME49 brain cysts. (**A**) Parasite burdens were measured in recipient spleens by real-time PCR for the B1 *T. gondii* gene 4 days after infection with  $1 \times 10^5$  RH tachyzoites i.p. The data presented are from one experiment,  $n = 5$  mice/group. (**B**) Cysts burdens were measured in the brains of NK cell recipient animals five weeks after infection with 10 ME49 cysts i.p. The data presented are from one experiment,  $n = 4$  mice/group. ns, not significant; \* $p < 0.05$ , \*\* $p < 0.01$ , one-way ANOVA.

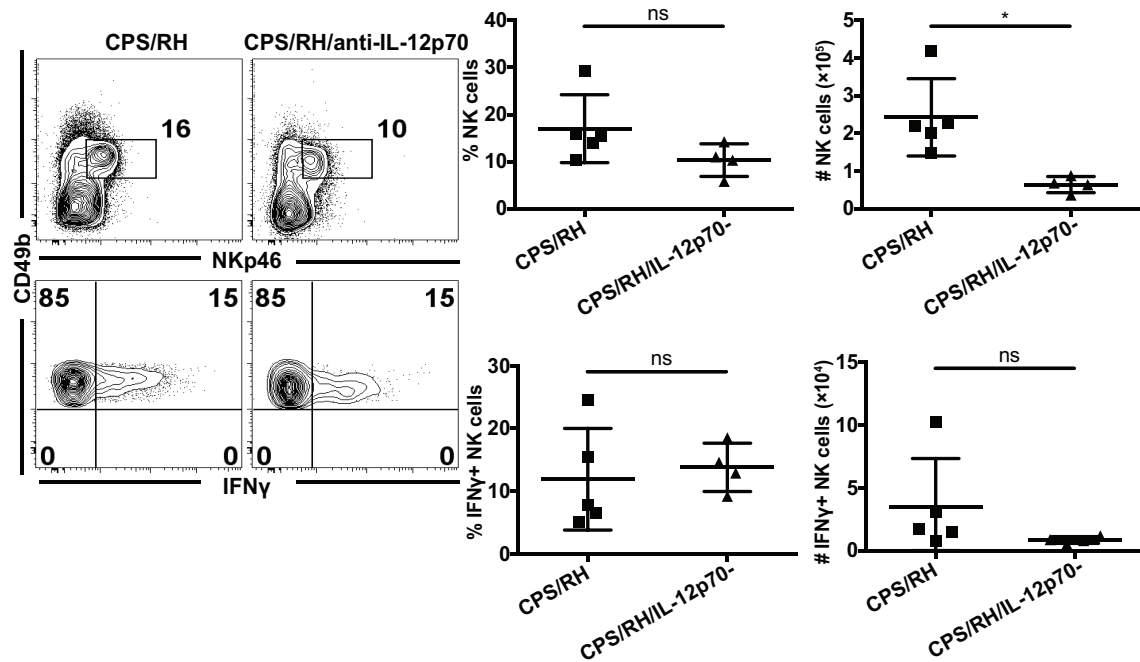

**Supplemental Figure 4.** IL-12p70 is required for the NK-cell response to secondary *T. gondii* infection. B6 mice were i.p. infected with  $1 \times 10^6$  CPS1-1 and 6 wk later were treated with IL-12p70 neutralizing antibody or were untreated during i.p. infection with  $1 \times 10^3$  RH tachyzoites. NK cells (CD49b+NKp46+CD3<sup>-</sup> lymphocytes) and their IFN $\gamma$  production were analyzed in PECs at 3 d after RH infection by flow cytometry. Representative contour plots present the frequency of NK cells (top panels) and IFN $\gamma$ + NK cells (bottom panels). The graphs present the frequency and number of NK cells and IFN $\gamma$ + NK cells from one of two independent experiments, n = 4 or 5 mice/group. Data are the mean  $\pm$  SD. ns, not significant; \*p < 0.05, unpaired Student's t-test with Welch's correction.
